# Supplementary material for: In Vivo Biocompatible Self-Assembled Nanogel Based on Hyaluronic Acid for Aqueous Solubility and Stability Enhancement of Asiatic Acid
Source: MDPI journal article supplement (doi:10.3390/polym13234071), 2021-11-23
Supplement: s1 [file s1]

Supplementary File

# In Vivo Biocompatible Self-Assembled Nanogel Based on Hyaluronic Acid for Aqueous Solubility and Stability Enhancement of Asiatic Acid

Yu Yu Win, Penpimon Charoenkanburkang, Vudhiporn Limprasutr, Ratchanee Rodsiri, Yue Pan, Visarut Buranasudja, Jittima Amie Luckanagul\*

## Supplementary information

| Dependent variables       | Independent variables | Independent variables | Mean difference | <i>p</i> value |
|---------------------------|-----------------------|-----------------------|-----------------|----------------|
| Loading amount (mM)       | AA-HA-pNIPAM 0.1      | AA-HA-pNIPAM 0.15     | 0.124**         | 0.005**        |
|                           |                       | AA-HA-pNIPAM 0.25     | 0.625***        | < 0.001***     |
|                           | AA-HA-pNIPAM 0.15     | AA-HA-pNIPAM 0.25     | 0.510***        | < 0.001***     |
| Loading efficiency (%)    | AA-HA-pNIPAM 0.1      | AA-HA-pNIPAM 0.15     | 6.041**         | 0.005**        |
|                           |                       | AA-HA-pNIPAM 0.25     | 30.546***       | < 0.001***     |
|                           | AA-HA-pNIPAM 0.15     | AA-HA-pNIPAM 0.25     | 24.505***       | < 0.001***     |
| Loading capacity (%)      | AA-HA-pNIPAM 0.1      | AA-HA-pNIPAM 0.15     | 5008.641***     | < 0.001***     |
|                           |                       | AA-HA-pNIPAM 0.25     | 9841.981***     | < 0.001***     |
|                           | AA-HA-pNIPAM 0.15     | AA-HA-pNIPAM 0.25     | 4832.804***     | < 0.001***     |
| Entrapment efficiency (%) | AA-HA-pNIPAM 0.1      | AA-HA-pNIPAM 0.15     | -12.159***      | < 0.001***     |
|                           |                       | AA-HA-pNIPAM 0.25     | -14.679**       | 0.002**        |
|                           | AA-HA-pNIPAM 0.15     | AA-HA-pNIPAM 0.25     | -2.510          | 0.811          |

\*\**p* < 0.01, \*\*\**p* < 0.001 vs. between mean values of two independent variables.

**Table S1:** Statistical analysis of loading amount, loading efficiency, loading capacity and entrapment efficiency of the nanogel formulations (mean ± SD, *n* = 3).
